# Supplementary material for: Evaluation of Non-Vector Transmission of Usutu Virus in Domestic Canaries (Serinus canaria)
Source: MDPI journal article supplement (doi:10.3390/v16010079), 2024-01-03
Supplement: s1 [file s1]

| Canary | Inoculation route                       | Mortality | Swab Ct |       |       | Infectious virus isolation |       |       |
|--------|-----------------------------------------|-----------|---------|-------|-------|----------------------------|-------|-------|
|        |                                         |           | 2 dpi   | 4 dpi | 6 dpi | 2 dpi                      | 4 dpi | 6 dpi |
| A1     | 10 <sup>6</sup> TCID <sub>50</sub> i.d. | 1         | 31.04   | 25.57 | 23.22 | -                          | +     | +     |
| A2     |                                         | 0         | 37.01   | 29.89 | 37.01 | -                          | +     | -     |
| A3     |                                         | 1         | 24.75   | 23.21 | 24.37 | +                          | +     | +     |
| A4     |                                         | 0         | 34.06   | 22.45 | 30.71 | -                          | +     | -     |
| A5     |                                         | 0         | 33.03   | 25.46 | 30.01 | -                          | +     | -     |
| A6     |                                         | 0         | 35.02   | 24.33 | 34.61 | -                          | +     | -     |
| B1     | i.d. sentinels                          | 0         | UND.    | UND.  | UND.  | -                          | -     | -     |
| B2     |                                         | 0         | UND.    | 37.77 | 37.92 | -                          | -     | -     |
| B3     |                                         | 0         | UND.    | 37.88 | 36.95 | -                          | -     | -     |
| B4     |                                         | 0         | UND.    | UND.  | 38.00 | -                          | -     | -     |
| B5     |                                         | 0         | UND.    | UND.  | 38.07 | -                          | -     | -     |
| B6     |                                         | 0         | UND.    | 38.15 | 37.85 | -                          | -     | -     |
| C1     | 10 <sup>6</sup> TCID <sub>50</sub> i.n. | 0         | 36.98   | 37.59 | 37.23 | -                          | -     | -     |
| C2     |                                         | 0         | 36.75   | 37.62 | 36.33 | -                          | -     | -     |
| C3     |                                         | 0         | 30.17   | 24.75 | 22.86 | -                          | +     | +     |
| C4     |                                         | 0         | 29.01   | 22.46 | 28.13 | +                          | +     | +     |
| C5     |                                         | 0         | 37.76   | 37.62 | 35.67 | -                          | -     | -     |
| C6     |                                         | 1         | 26.85   | 24.17 | 22.58 | +                          | +     | +     |
| D1     | 10 <sup>4</sup> TCID <sub>50</sub> i.n. | 0         | UND.    | 37.96 | 37.58 | -                          | -     | -     |
| D2     |                                         | 0         | UND.    | 37.92 | 37.62 | -                          | -     | -     |
| D3     |                                         | 1         | 31.66   | 25.23 | 26.82 | -                          | +     | +     |
| D4     |                                         | 0         | UND.    | 37.83 | UND.  | -                          | -     | -     |
| D5     |                                         | 0         | UND.    | 37.98 | UND.  | -                          | -     | -     |
| D6     |                                         | 0         | UND.    | 35.73 | 37.75 | -                          | -     | -     |
| E1     | 10 <sup>2</sup> TCID <sub>50</sub> i.n. | 0         | UND.    | 36.96 | 38.74 | -                          | -     | -     |
| E2     |                                         | 0         | 36.60   | 37.94 | UND.  | -                          | -     | -     |
| E3     |                                         | 0         | UND.    | 38.02 | 35.70 | -                          | -     | -     |
| E4     |                                         | 0         | UND.    | 37.89 | UND.  | -                          | -     | -     |
| E5     |                                         | 0         | UND.    | UND.  | UND.  | -                          | -     | -     |
| E6     |                                         | 0         | UND.    | UND.  | UND.  | -                          | -     | -     |
| F1     | i.n. sentinels                          | 0         | UND.    | UND.  | 35.92 | -                          | -     | -     |
| F2     |                                         | 0         | UND.    | UND.  | 36.63 | -                          | -     | -     |
| F3     |                                         | 0         | UND.    | UND.  | 35.39 | -                          | -     | -     |
| F4     |                                         | 0         | UND.    | UND.  | 35.00 | -                          | -     | -     |
| F5     |                                         | 0         | UND.    | UND.  | 37.68 | -                          | -     | -     |
| F6     |                                         | 0         | UND.    | UND.  | 36.05 | -                          | -     | -     |
